# Supplementary material for: Preprint articles as a tool for teaching data analysis and scientific communication
Source: PubMed Central journal article supplement (PMC8691640; doi:10.1371/journal.pone.0261622), 2021-12-21
Supplement: pone.0261622.s003.pdf [file pone.0261622.s003.pdf]

### **Worksheet Part 3: Overall Impressions of Scientific Review**

For the preprint, what was the date on which it was posted?

For the final paper, what was the date of submission?

For the final paper, what was the date of acceptance?

For the final paper, on what date was it published?

Please use 3-5 sentences to answer each question below

1. What surprised you most when you compared the preprint and final versions of the paper?
2. Is it easy or hard to distinguish which additions were made because the authors had more time to acquire more data and additions that were made due to requests from the peer reviewers? How do you think you can you tell the two apart?
3. What, if anything, did you learn about the scientific publishing process from this activity?
4. What, if anything, did you learn about presenting and interpreting research data from this activity?
